# Supplementary material for: Ecotoxicological effects of CuO and TiO2 nanoparticles dietary exposure on the marine gastropod Littorina brevicula
Source: PeerJ. 2025 Aug 12;13:e19838. doi: 10.7717/peerj.19838 (PMC12356180; doi:10.7717/peerj.19838)
Supplement: Supplemental Information 1 — The raw data show measurements of DNA damage and element accumulation in tissues of control and experimental groups. [file peerj-13-19838-s001.xlsx]

## Sheet: Лист1
		Comet assay						Cu content							Ti content
		Control	CuO	TiO2				DG			ST				DG			ST
		3.409	9.343	5.473				Control	CuO	TiO2	Control	CuO	TiO2		Control	CuO	TiO2	Control	CuO	TiO2
		4.593	9.244	5.741				75.22	387.03	101.12	62.07	318.38	79.2		6.29	3.84	325.01	5.09	3.94	479.12
		3.757	7.226	7.53				71.37	351.52	106.24	66.35	340.07	75.36		6.11	3.72	325.46	4.29	3.89	479.39
		4.982	8.207	6.51				69.24	375.13	103.38	60.79	315.21	78.05		6.25	4.96	296.77	4.38	4.11	453.31
		4.229	8.366	7.414				75.91	351.84	105.8	64.87	320.49	70.15		5.05	3.24	313.37	4.22	4.66	459.44
		3.033	8.511	6.417				80.29	361.11	109.17	63.04	300.39	72.37		6.35	3.68	320.4	3.63	3.7	476.85
		5.331	7.183	6.223				78.51	399.52	98.33	65.7	321.04	73.91		5.96	3.86	327.06	5.02	4.29	460.14
		4.223	11.085	7.123			mean	75.09	371.025	104.007	63.8033	319.263	74.84		6.00167	3.88333	318.012	4.43833	4.09833	468.042
		4.134	8.292	5.115			sd	4.18298	19.656	3.89394	2.18577	12.7357	3.42187		0.486885	0.573329	11.5307	0.545799	0.340436	11.6837
	mean	4.18789	8.60633	6.394
	sd	0.727441	1.19108	0.852647
					MDA
					Control	CuO	TiO2
					48.2	61.11	61.88				Neutral red		Resazurin
					49.59	64.93	64.37				Cuo	TiO2	Cuo	TiO2
					42.33	59	61.27				98.61	90.32	82.12	95.33
					44.55	59.26	60.84				93.35	95.67	73.01	95.67
					47.06	63.17	59.34				98.39	87.3	80.21	93.21
					48.25	60.33	61.01				97.23	89.52	80.49	93.73
					46.59	52.97	60.77				97.92	89.36	80.21	89.08
					49.04	59.47	54.96				96.17	87.11	79.02	91.86
					48.11	62.09	60.8				96.98	91.06	74.56	96.38
				mean	47.08	60.2589	60.5822				86.99	86.97	84.15	97.09
				sd	2.31921	3.36729	2.49973				97.96	87.66	86.24	93.71
										mean	95.9556	89.4411	80.0011	94.0067
										sd	3.72054	2.77269	4.18923	2.48337
